# Supplementary material for: Immunogenicity of Adjuvanted Psoralen-Inactivated SARS-CoV-2 Vaccines and SARS-CoV-2 Spike Protein DNA Vaccines in BALB/c Mice
Source: MDPI journal article supplement (doi:10.3390/pathogens10050626), 2021-05-19
Supplement: s1 [file s1]

Supplemental Figure 1.

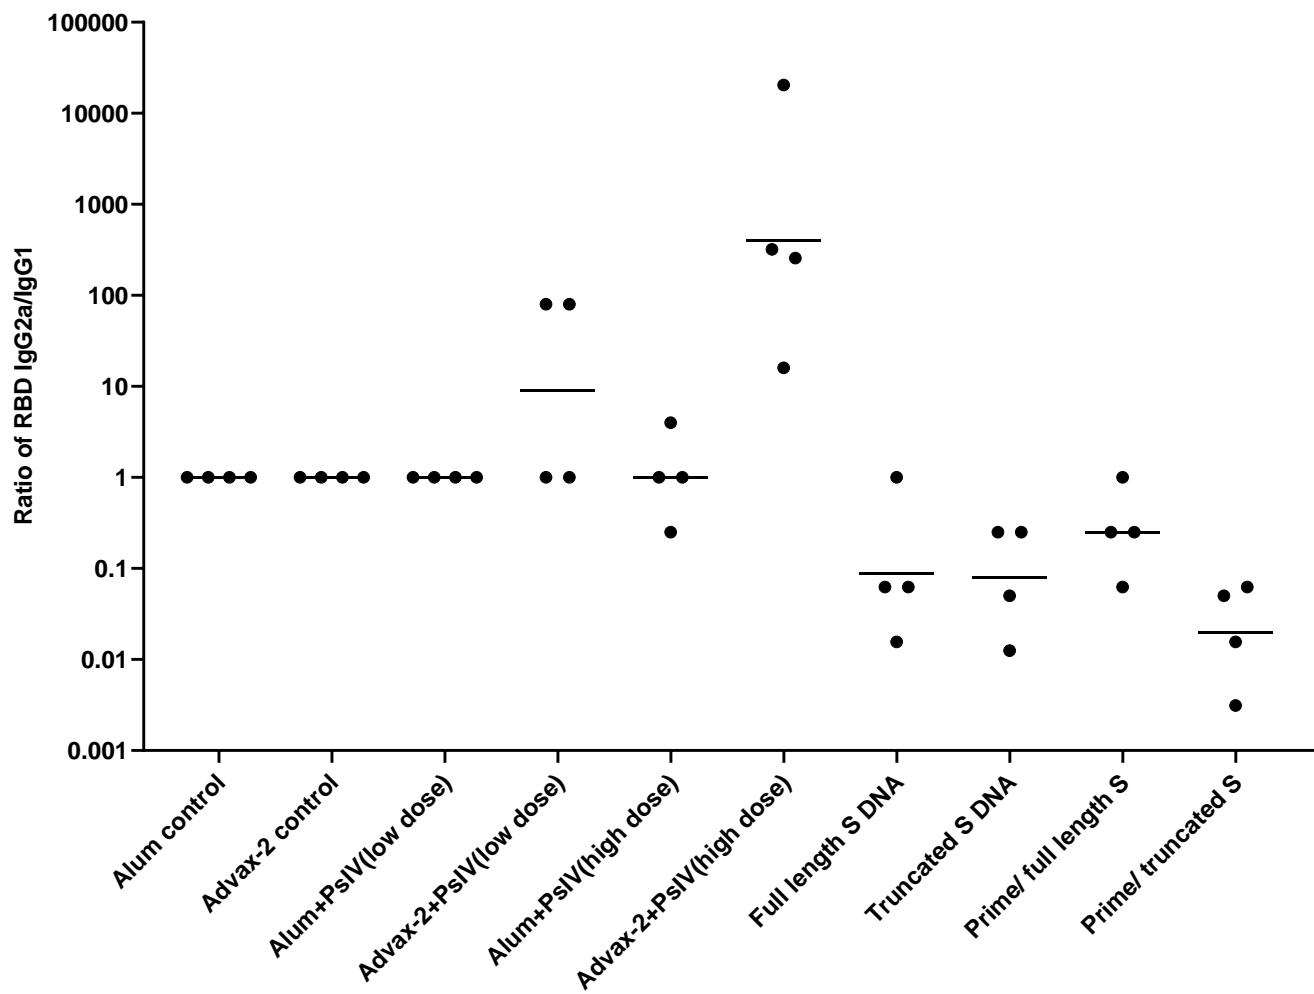

**Figure Legend S1.** Ratio of IgG2a to IgG1 endpoint titers to RBD. Each symbol represents one mouse and the horizontal line represents geometric mean value.
